# Supplementary material for: Effect of temperature perturbation on hydrogen bonding in aqueous solutions of different urea concentrations
Source: Royal Society of Chemistry journal article supplement (doi:10.1039/c5ra10718k), 2015-01-01
Supplement: c5ra10718k1.pdf [file c5ra10718k1.pdf]

*RSC Advances*

# Perturbation from temperature on hydrogen bonding in aqueous solutions for different urea concentrations†

Noushaba Nusrat Mafy,<sup>a</sup> Tanjina Afrin,<sup>a</sup> M. Muhibur Rahman,<sup>b</sup> M. Yousuf A. Mollah<sup>a</sup> and

Md. Abu Bin Hasan Susan<sup>a\*</sup>

<sup>a</sup>*Department of Chemistry, University of Dhaka, Dhaka 1000, Bangladesh*

<sup>b</sup>*University Grants Commission of Bangladesh, Agargaon, Dhaka 1207, Bangladesh*

## Electronic supplementary information (ESI)

**Fig. S1** FTIR spectrum of solid urea.

**Fig. S2** ATR FTIR spectra of (a) pure water (b) aqueous urea solutions at different concentrations.

**Fig. S3** NIR spectra of pure water at different temperatures.

**Fig. S4** Difference spectra of (a) pure water (b) 6.0 M aqueous urea solution obtained with respect to the first spectrum measured at 20 °C.

**Fig. S5** Second derivative spectra of pure water at different temperatures.

**Fig. S6** Second derivative spectra of 1.5 M aqueous urea solution at different temperatures.

**Fig. S7** Temperature dependent deconvoluted spectra of pure water.

**Fig. S8** Variation of band position for (a) weak (b) third or moderate strength (c) normal or strong (d) strong hydrogen-bonded components resolved from the temperature dependent NIR spectra of pure water and aqueous urea solutions.

**Fig. S9** Power spectra of three distinct groups of aqueous urea solutions.

**Fig. S10** Variation of apparent molar volume with temperature and concentration.

**Fig. S11** Variation of entropy with concentration of urea.

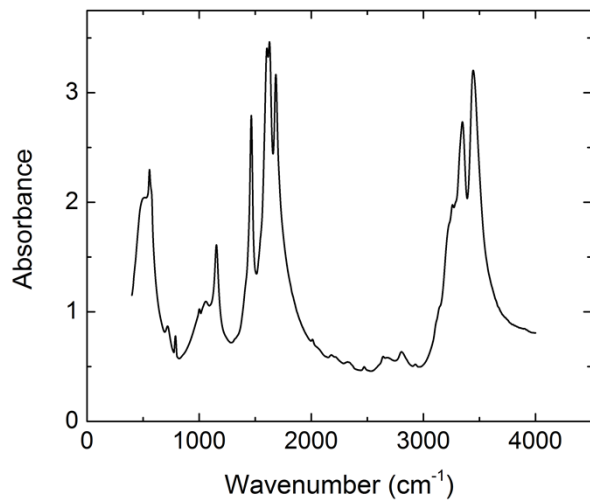

**Fig. S1** FTIR spectrum of solid urea.

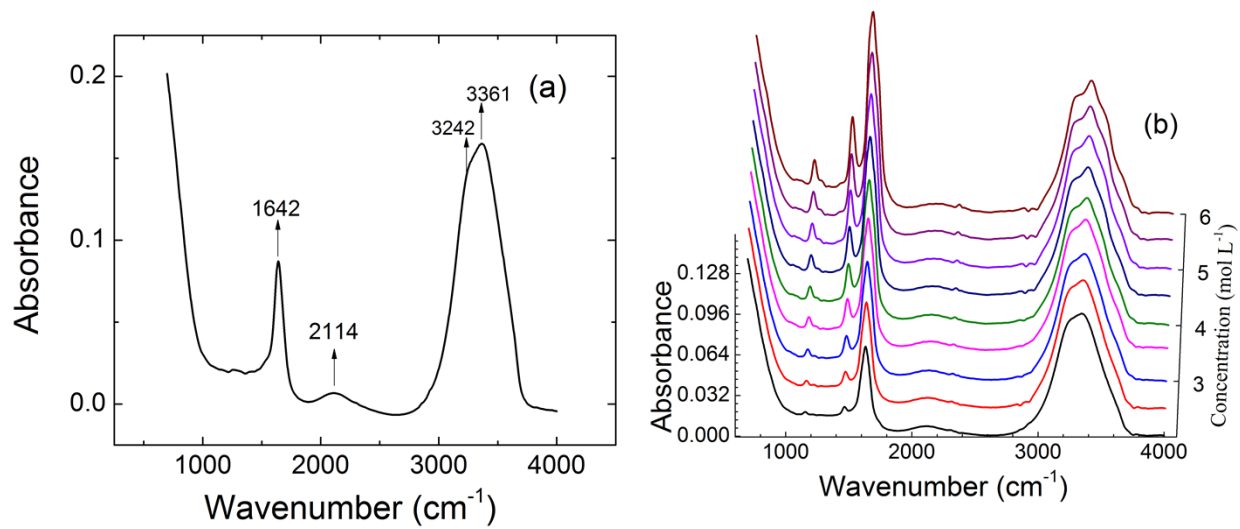

**Fig. S2** ATR FTIR spectra of (a) pure water (b) aqueous urea solution at different concentrations.

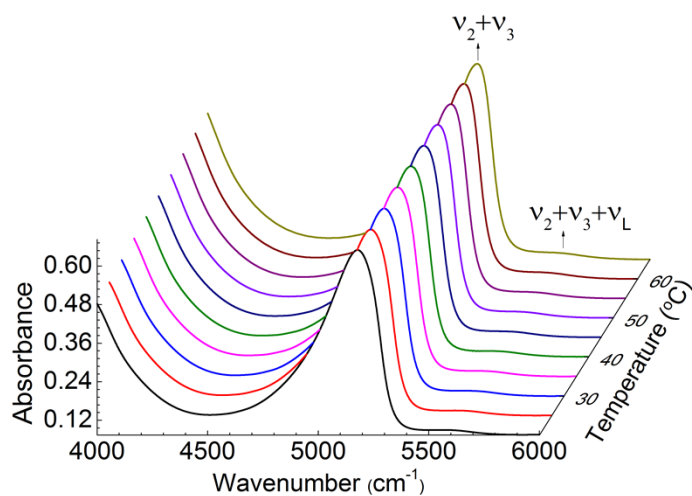

**Fig. S3** NIR spectra of pure water at different temperatures.

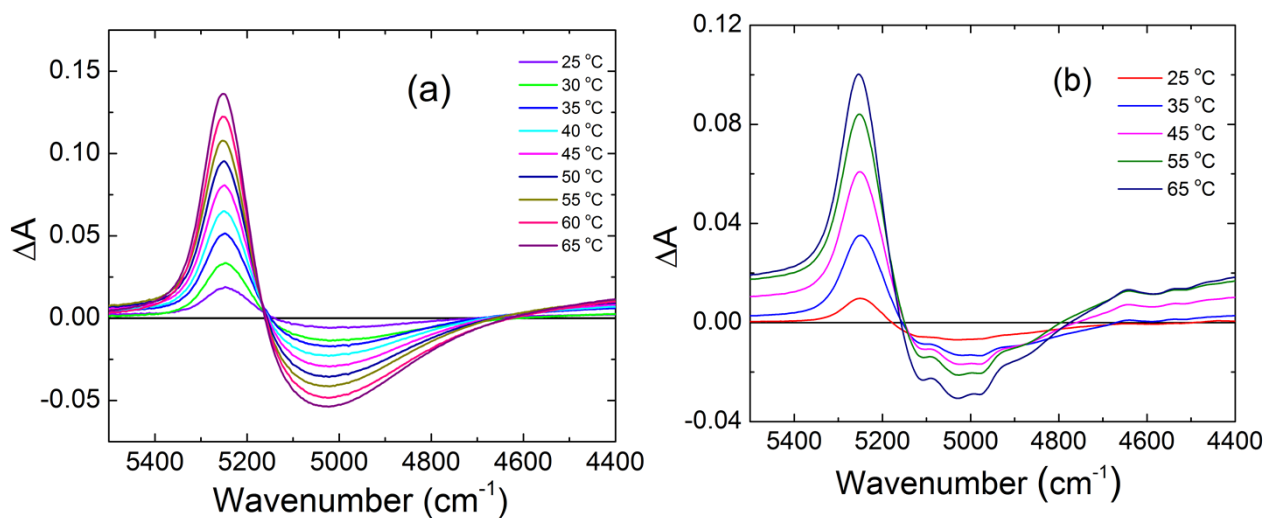

**Fig. S4** Difference spectra of (a) pure water (b) 6.0 M aqueous urea solution obtained with respect to the first spectrum measured at 20 °C.

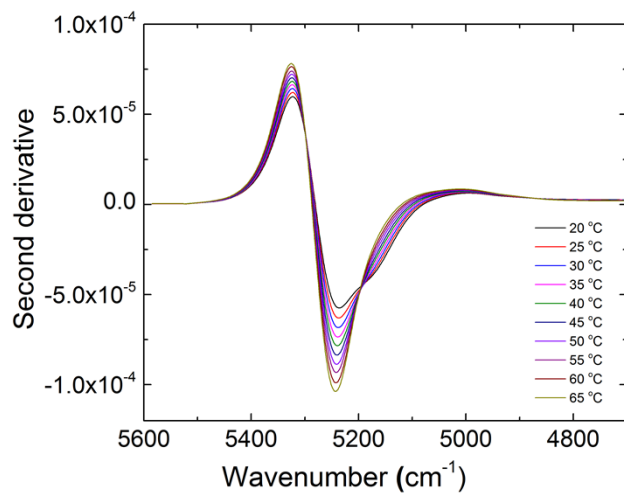

**Fig. S5** Second derivative spectra of pure water at different temperatures.

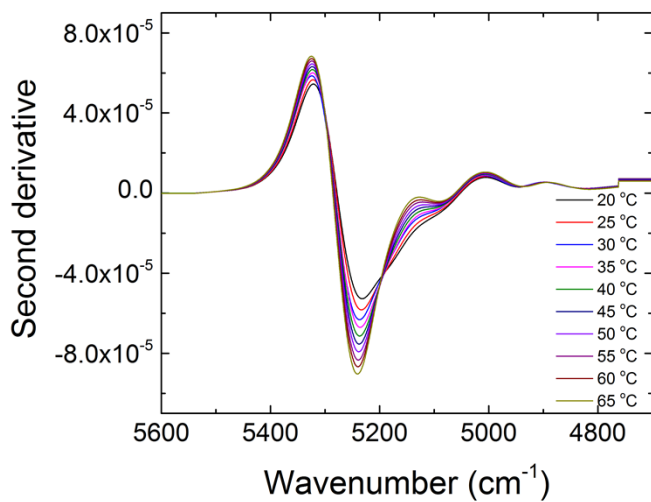

**Fig. S6** Second derivative spectra of 1.5 M aqueous urea solution at different temperatures.

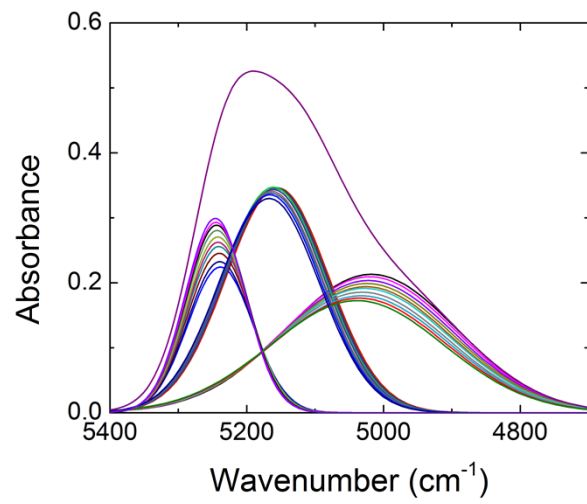

**Fig. S7** Temperature dependent deconvoluted spectra of pure water.

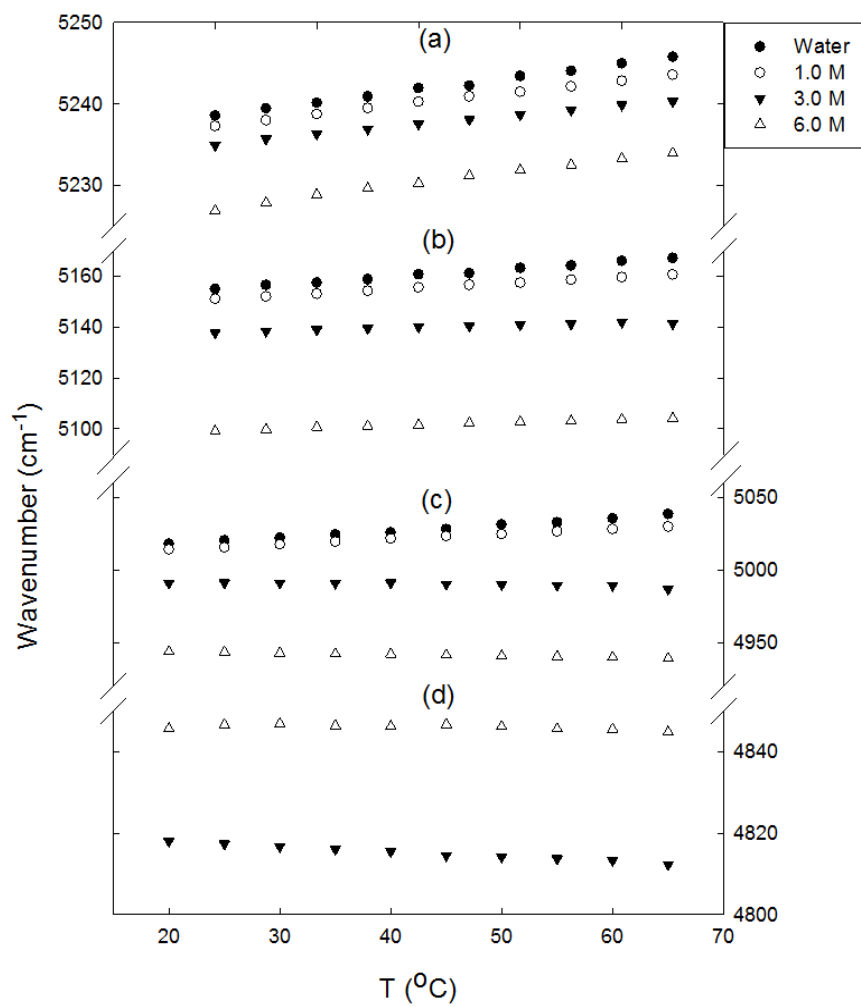

**Fig. S8** Variation of band position for (a) weak (b) third or moderate strength (c) normal or strong (d) strong hydrogen-banded components resolved from the temperature dependent NIR spectra of pure water and aqueous urea solutions.

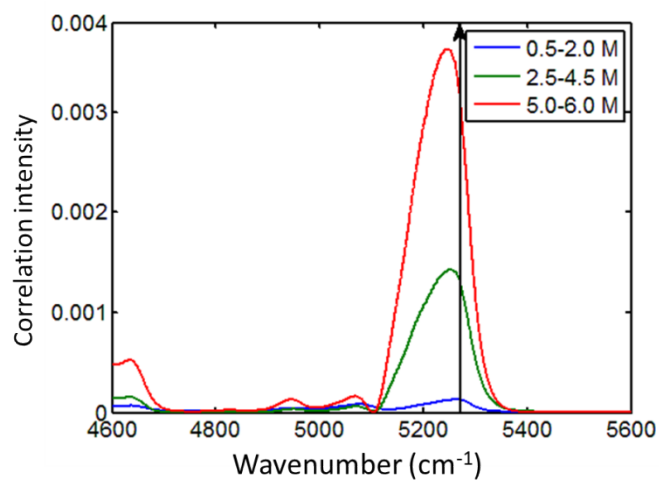

**Fig. S9** Power spectra of three distinct groups of aqueous urea solutions.

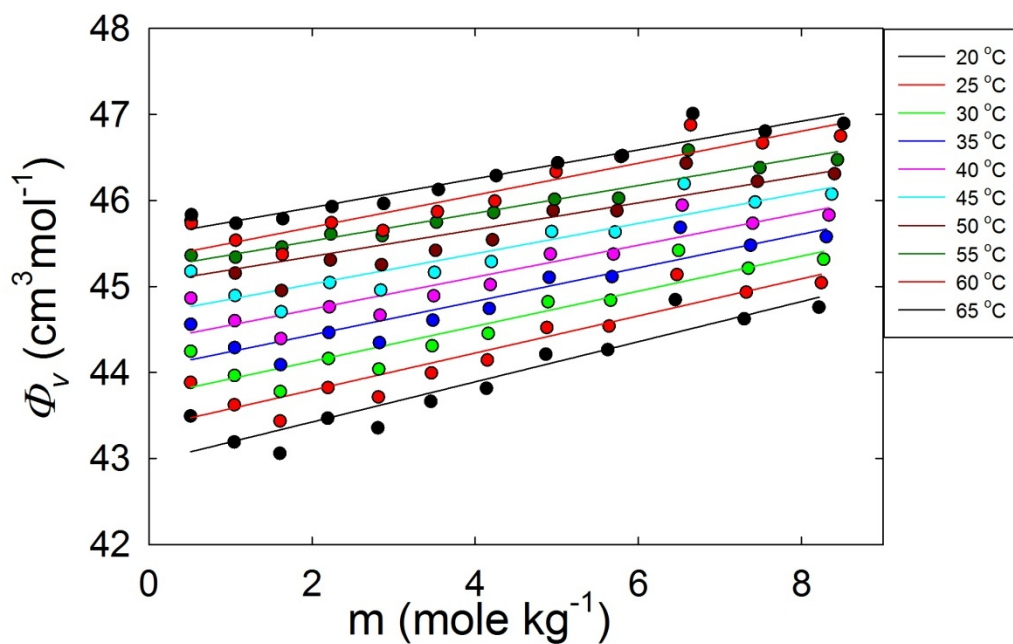

**Fig. S10** Variation of apparent molar volume with temperature and concentration.



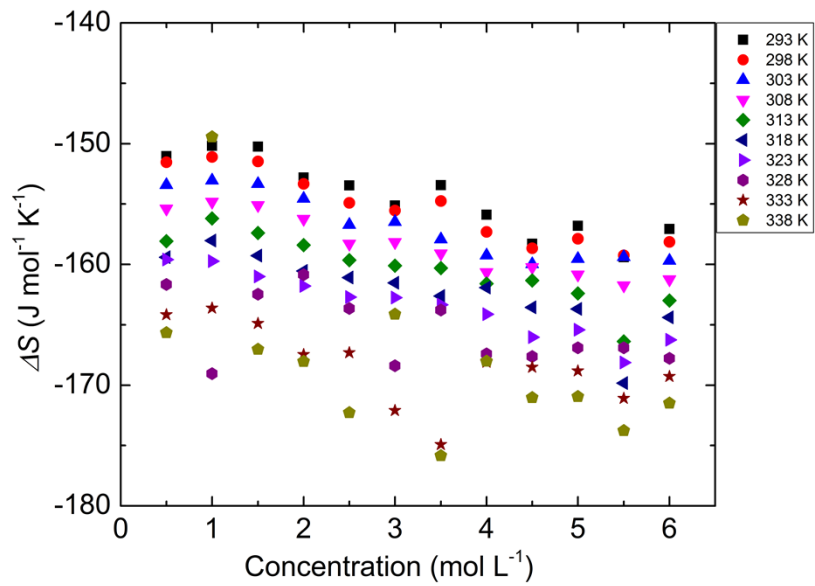

**Fig. S11** Variation of entropy with concentration of urea.
